# Supplementary material for: Association between workload and support utilisation - A longitudinal study on emergency medical service personnel
Source: Research Square preprint supplement (doi:10.21203/rs.3.rs-8279546/v1), 2025-12-15
Supplement: Supplementary file 1 [file 35f8cdd2931069e517df6d47.docx]

Supplementary table 2:

Fit statistics for a 1 through 6 class model for latent class analysis of formal support utilisation at work

|  | Log-Likelihood |  | Chi2 (df) | p | AIC | BIC | ssaBIC | LMR-A (p) | BSLRT (p) | Entropy |
| --- | --- | --- | --- | --- | --- | --- | --- | --- | --- | --- |
| 1 class | -361.941 |  | 61.207 (4) | .000 | 729.883 | 741.092 | 731.578 | - | - | - |
| 2 classes | -345.826 |  | 0.637 (0) | .000 | 705.653 | 731.809 | 709.607 | .000 | 0.000 | .894 |
| 3 classes | -345.230 |  | - | - | 712.460 | 753.562 | 718.675 | .000 | 0.288 | 0.988 |
| 4 classes | -345.230 |  | - | - | 720.460 | 776.509 | 728.934 | .500 | 1.000 | .669 |
| 5 classes | -345.230 |  | - | - | 728.460 | 799.455 | 739.194 | .502 | 1.000 | .574 |
| 6 classes | -345.230 |  | - | - | 736.460 | 822.401 | 749.454 | .263 | 1.000 | .404 |

Note: Chi2: Pearson Chi-Square Test of Model Fit for the Binary and Ordered Categorical (Ordinal) Outcomes. df = degrees of freedom. AIC: Akaike Information Criteria, BIC: Bayesian Information Criteria, ssaBIC: Sample-size adjusted Bayesian Information Criteria, LMR-A: Lo-Mendell-Rubin adjusted likelihood ratio test. BSLRT: Bootstrapped adjusted likelihood ratio test.
