# Supplementary material for: Association between workload and support utilisation - A longitudinal study on emergency medical service personnel
Source: Research Square preprint supplement (doi:10.21203/rs.3.rs-8279546/v1), 2025-12-15

Supplementary figure 2:

Graphic representation of the 3-class structure of formal support utilisation


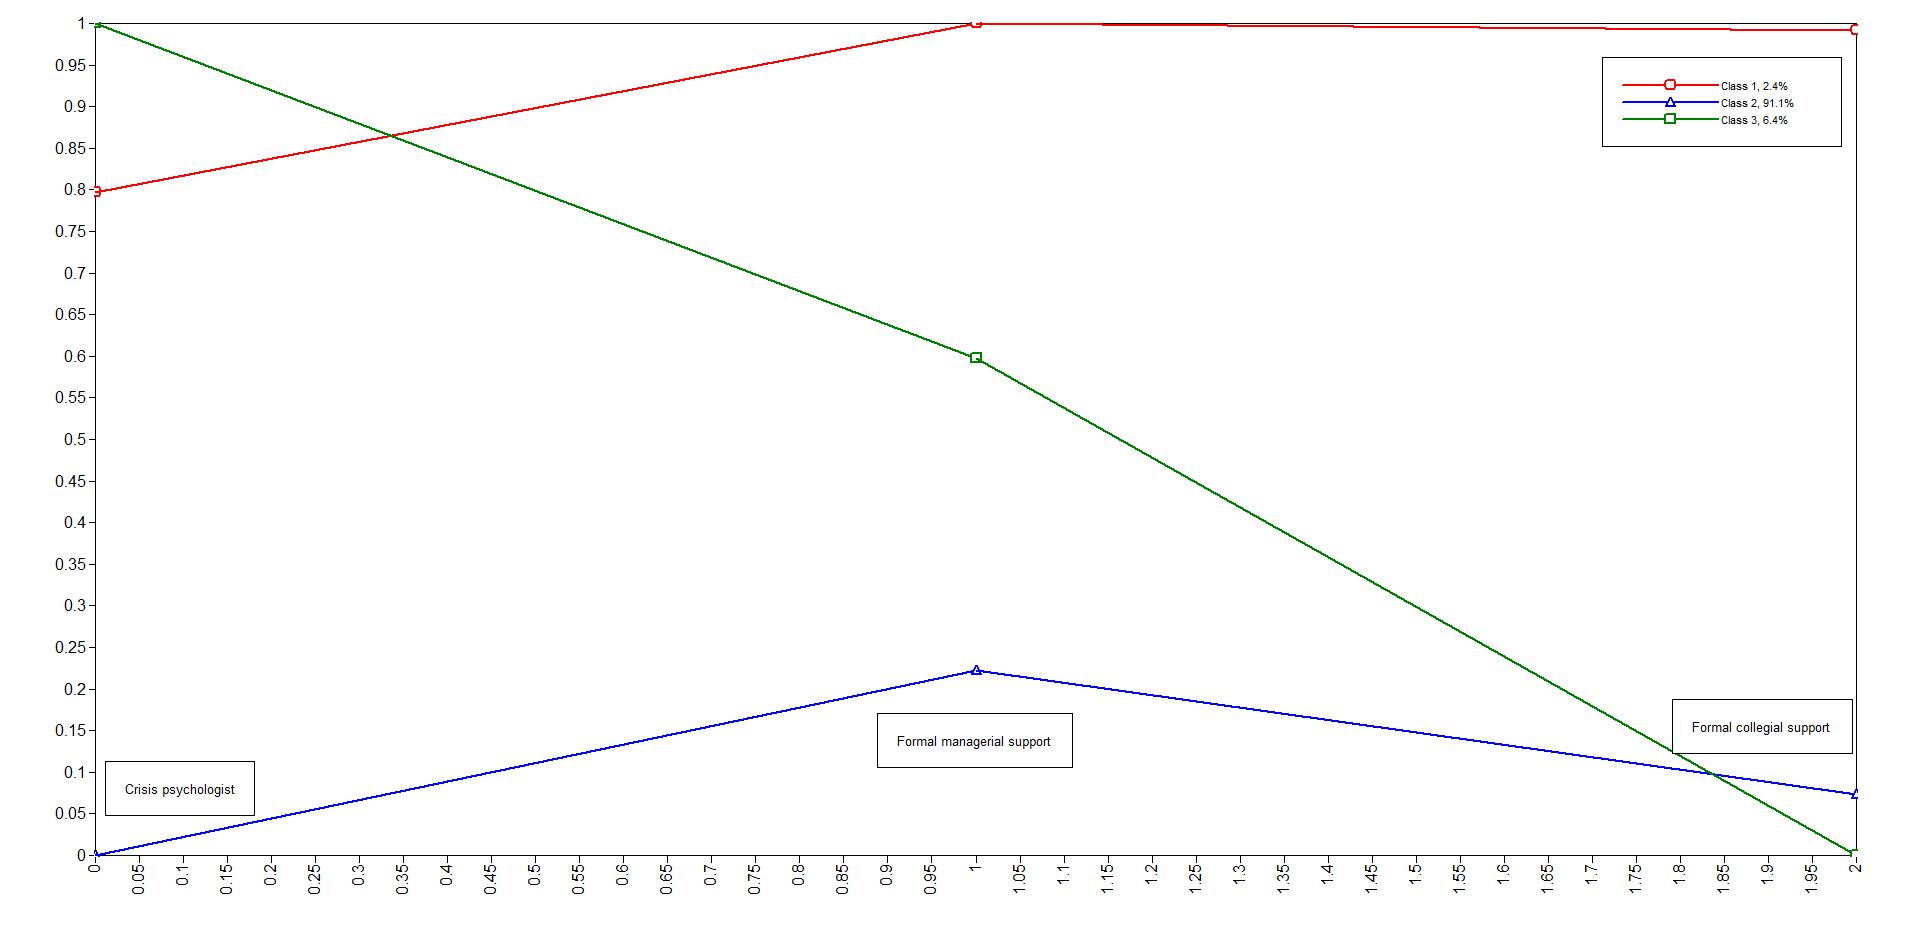

Supplement: Supplementary file 2 [file 6d61366d9c55fc4c5203e888.docx]
