# Supplementary material for: Association between workload and support utilisation - A longitudinal study on emergency medical service personnel
Source: Research Square preprint supplement (doi:10.21203/rs.3.rs-8279546/v1), 2025-12-15

Supplementary figure 4:

Graphic representation of the 5-class structure of formal support utilisation


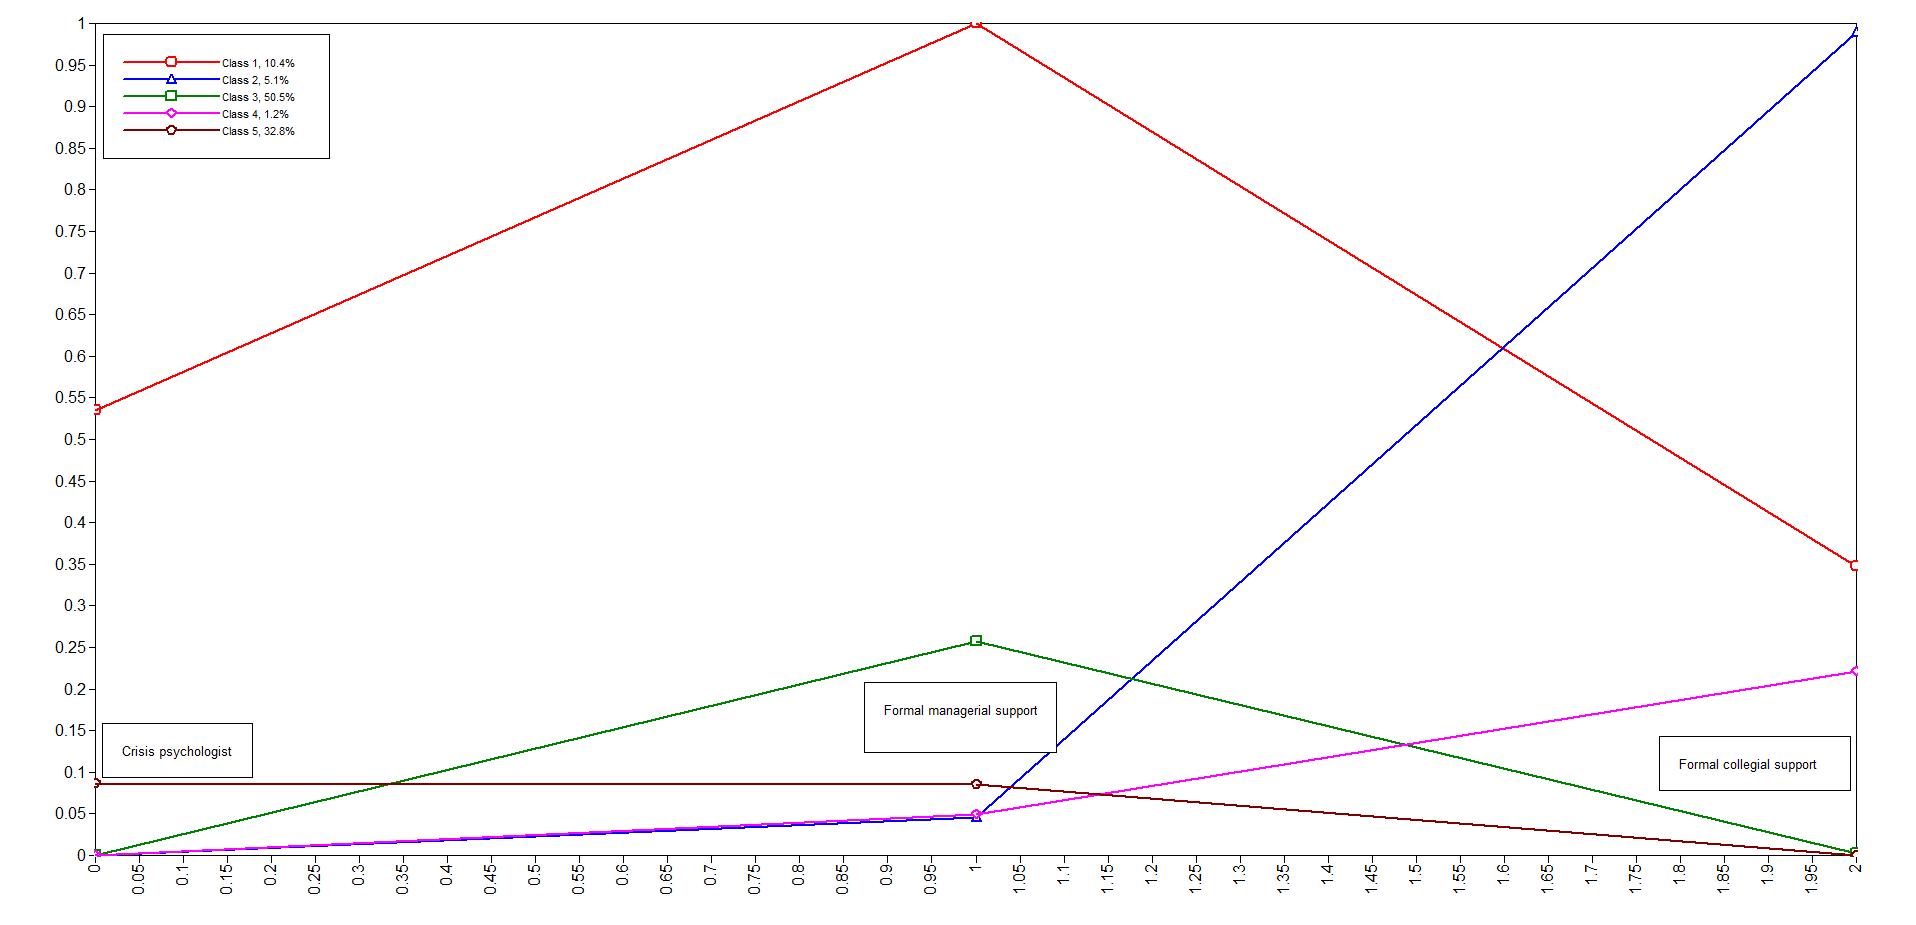

Supplement: Supplementary file 3 [file 802dde94c2e06de2a6e30733.docx]
