# Supplementary material for: Association between workload and support utilisation - A longitudinal study on emergency medical service personnel
Source: Research Square preprint supplement (doi:10.21203/rs.3.rs-8279546/v1), 2025-12-15

Supplementary figure 1:

Graphic representation of the 2-class structure of formal support utilisation


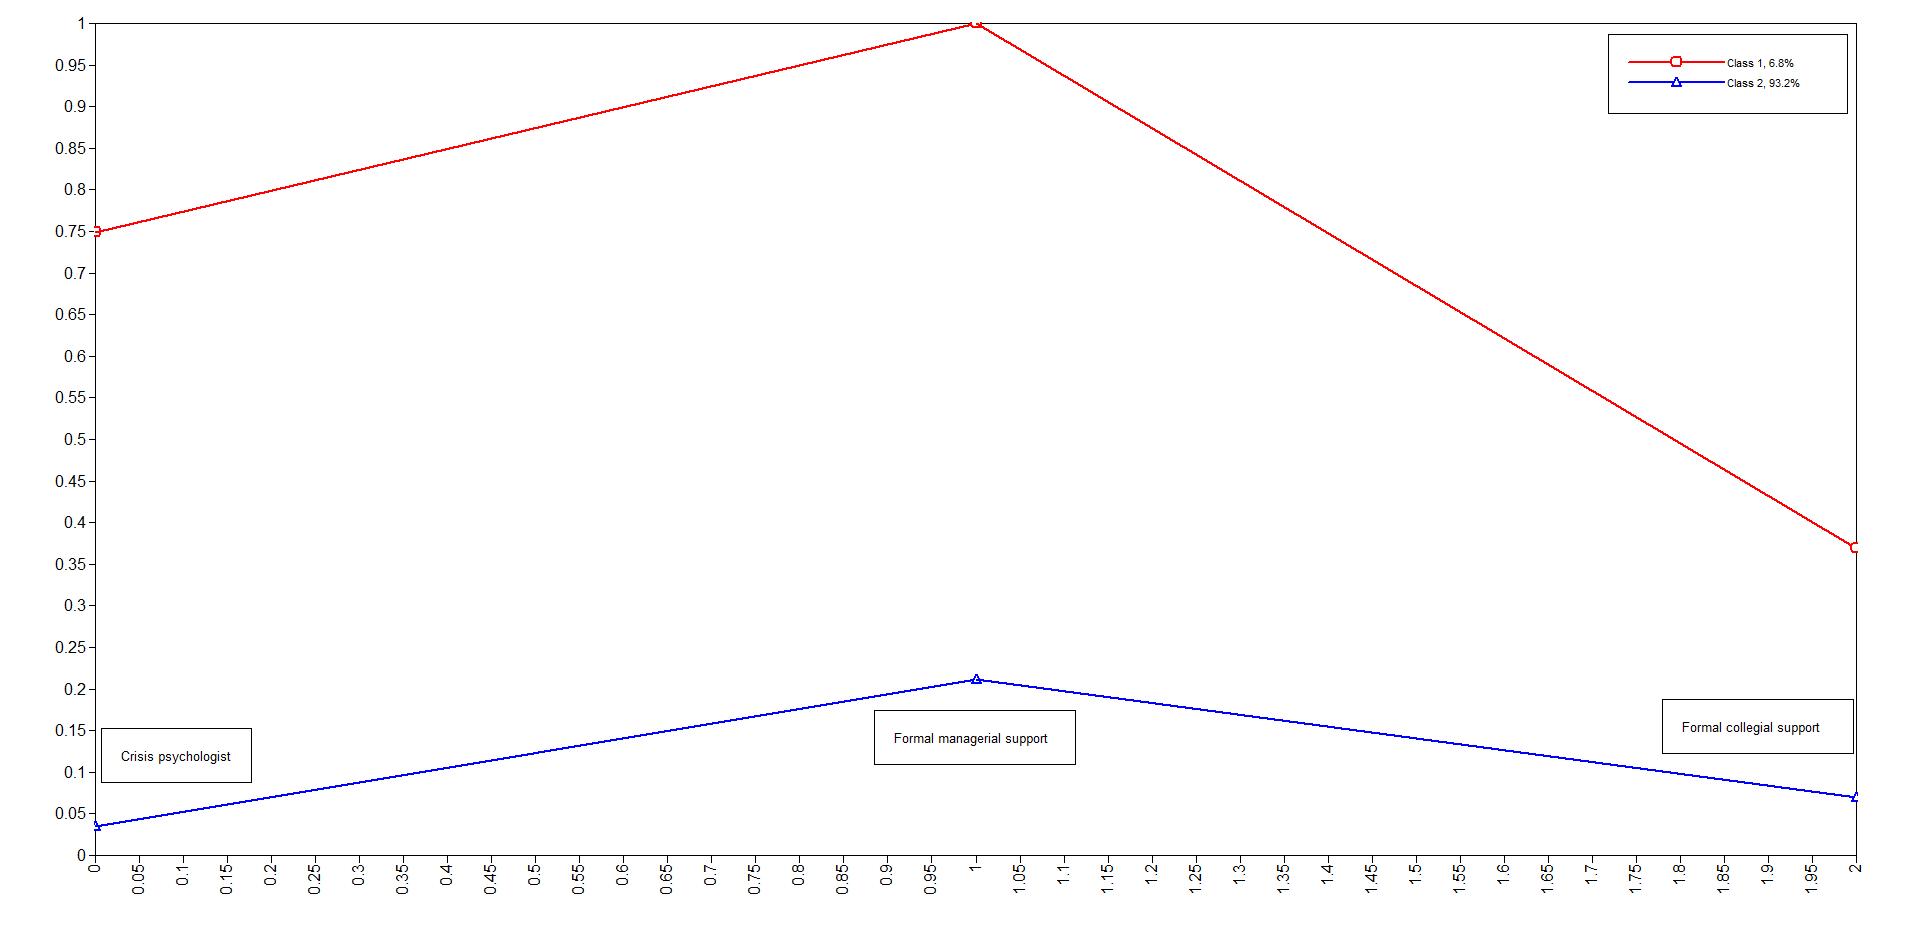

Supplement: Supplementary file 4 [file 896a2445b419516fe25a9475.docx]
