# Supplementary material for: Association between workload and support utilisation - A longitudinal study on emergency medical service personnel
Source: Research Square preprint supplement (doi:10.21203/rs.3.rs-8279546/v1), 2025-12-15
Supplement: Supplementary file 5 [file a4f3ecc9265286f7489b375b.docx]

Supplementary table 1:

Overview of formal support utilisation (measured at baseline)

| Group | Factor/items | Not used/used/missing |
| --- | --- | --- |
| 1 | Crisis psychologist accessed through work | 283/26/32 |
| 2 | Formal managerial support | 227/82/32 |
| 3 | Formal collegial support | 281/28/32 |
