# Supplementary material for: Association between workload and support utilisation - A longitudinal study on emergency medical service personnel
Source: Research Square preprint supplement (doi:10.21203/rs.3.rs-8279546/v1), 2025-12-15

Supplementary figure 5:

Graphic representation of the 6-class structure of formal support utilisation


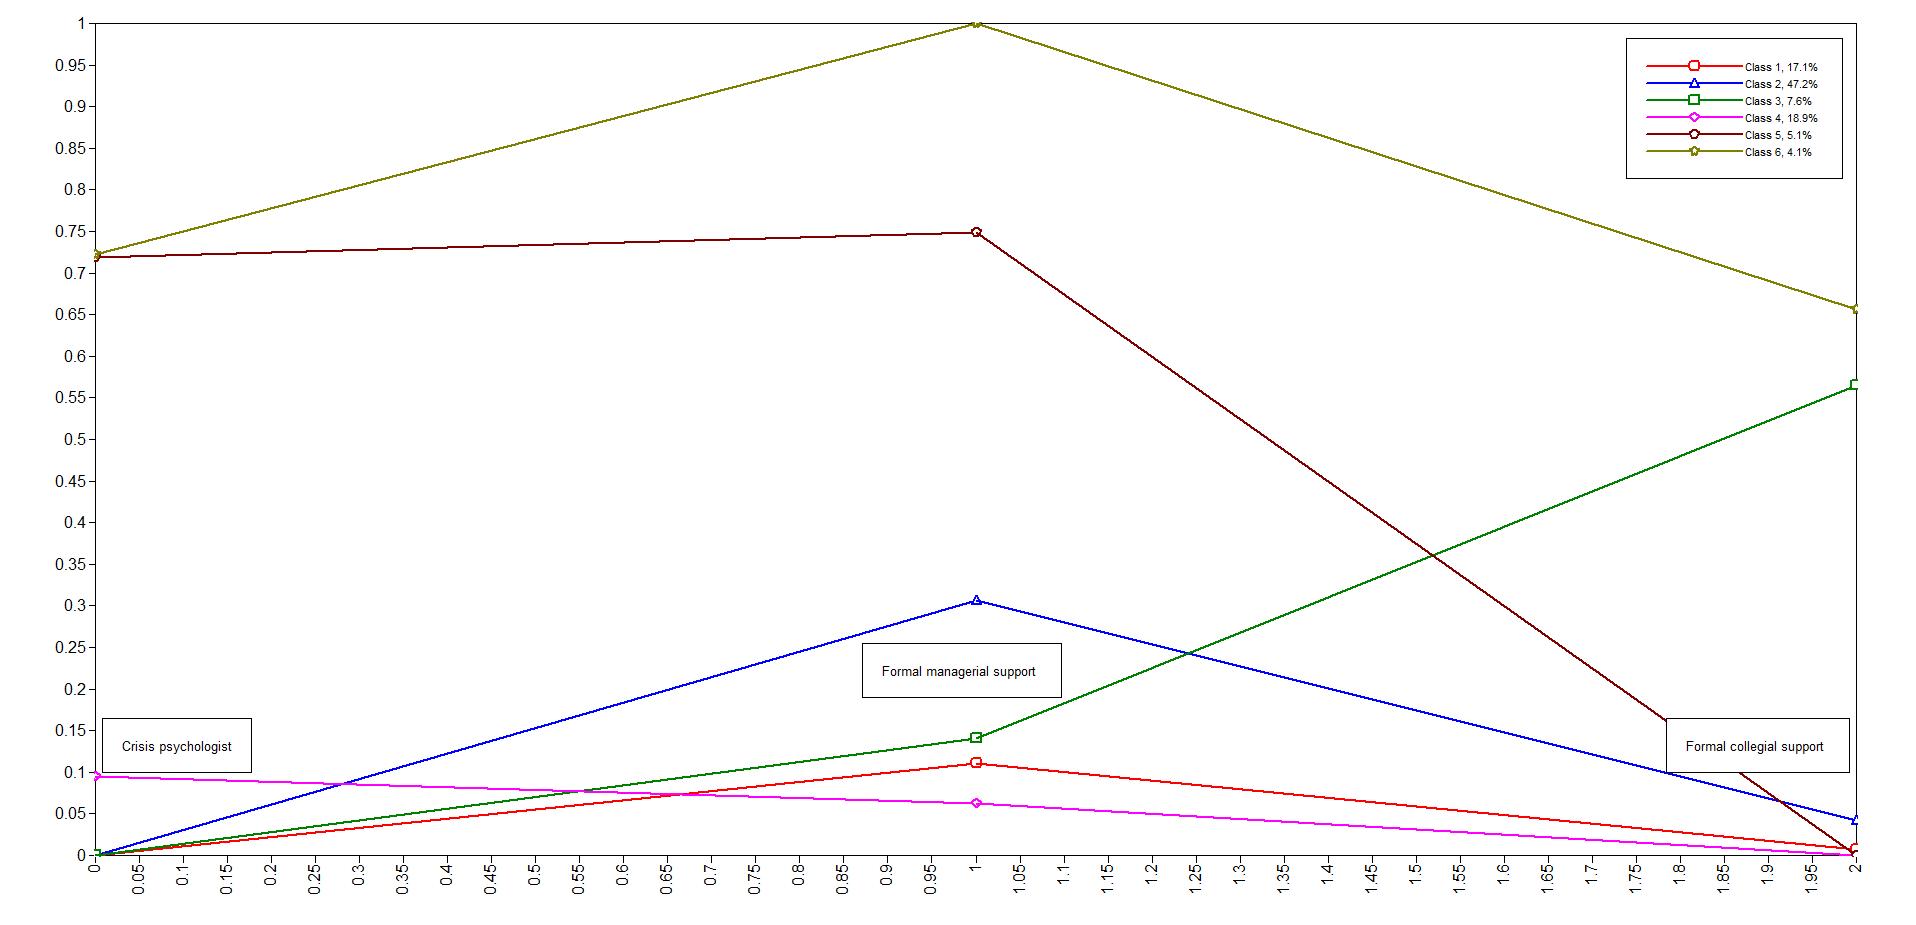

Supplement: Supplementary file 6 [file ad5240e8c38d9fe0631afb4a.docx]
