# Supplementary material for: Association between workload and support utilisation - A longitudinal study on emergency medical service personnel
Source: Research Square preprint supplement (doi:10.21203/rs.3.rs-8279546/v1), 2025-12-15

Supplementary figure 3:

Graphic representation of the 4-class structure of formal support utilisation


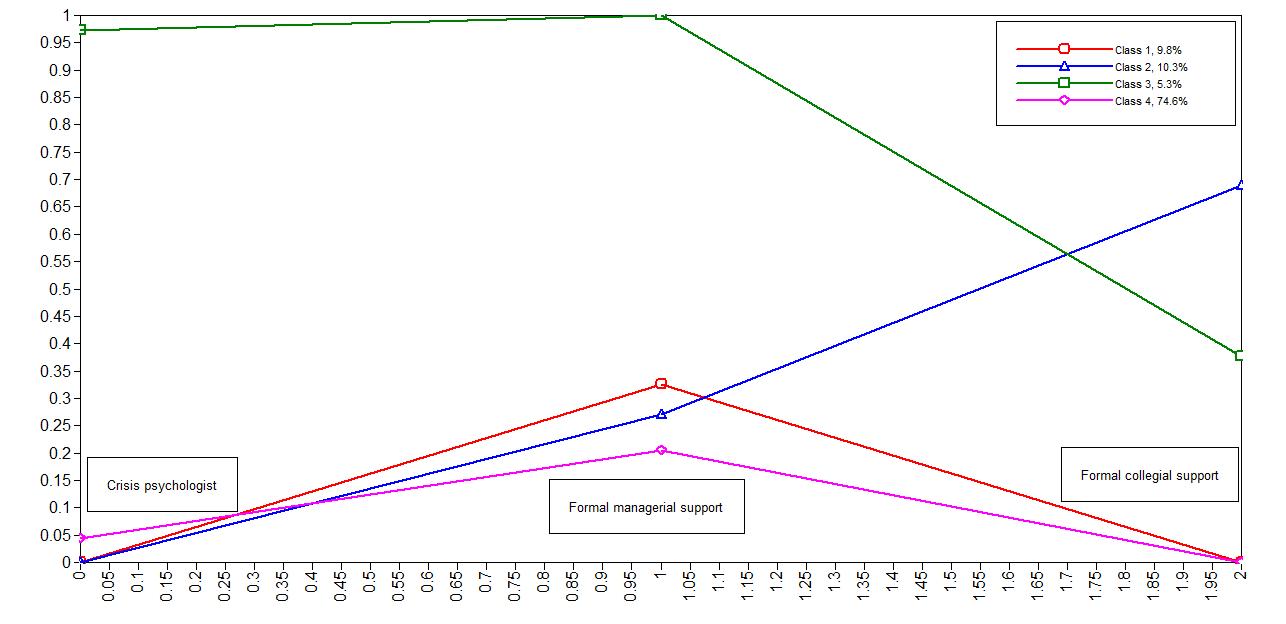

Supplement: Supplementary file 7 [file c8596176cb092827ca096f47.docx]
